# Supplementary figures and images for: Phase I Study of the Liposomal Formulation of Eribulin (E7389-LF): Results from the Advanced Gastric Cancer Expansion Cohort
Source: PubMed Central journal article supplement — Clin Cancer Res. 2023 Feb 2;29(8):1460–7. doi: 10.1158/1078-0432.CCR-22-3027 (PMC10102841; doi:10.1158/1078-0432.ccr-22-3027), 2023-02-02

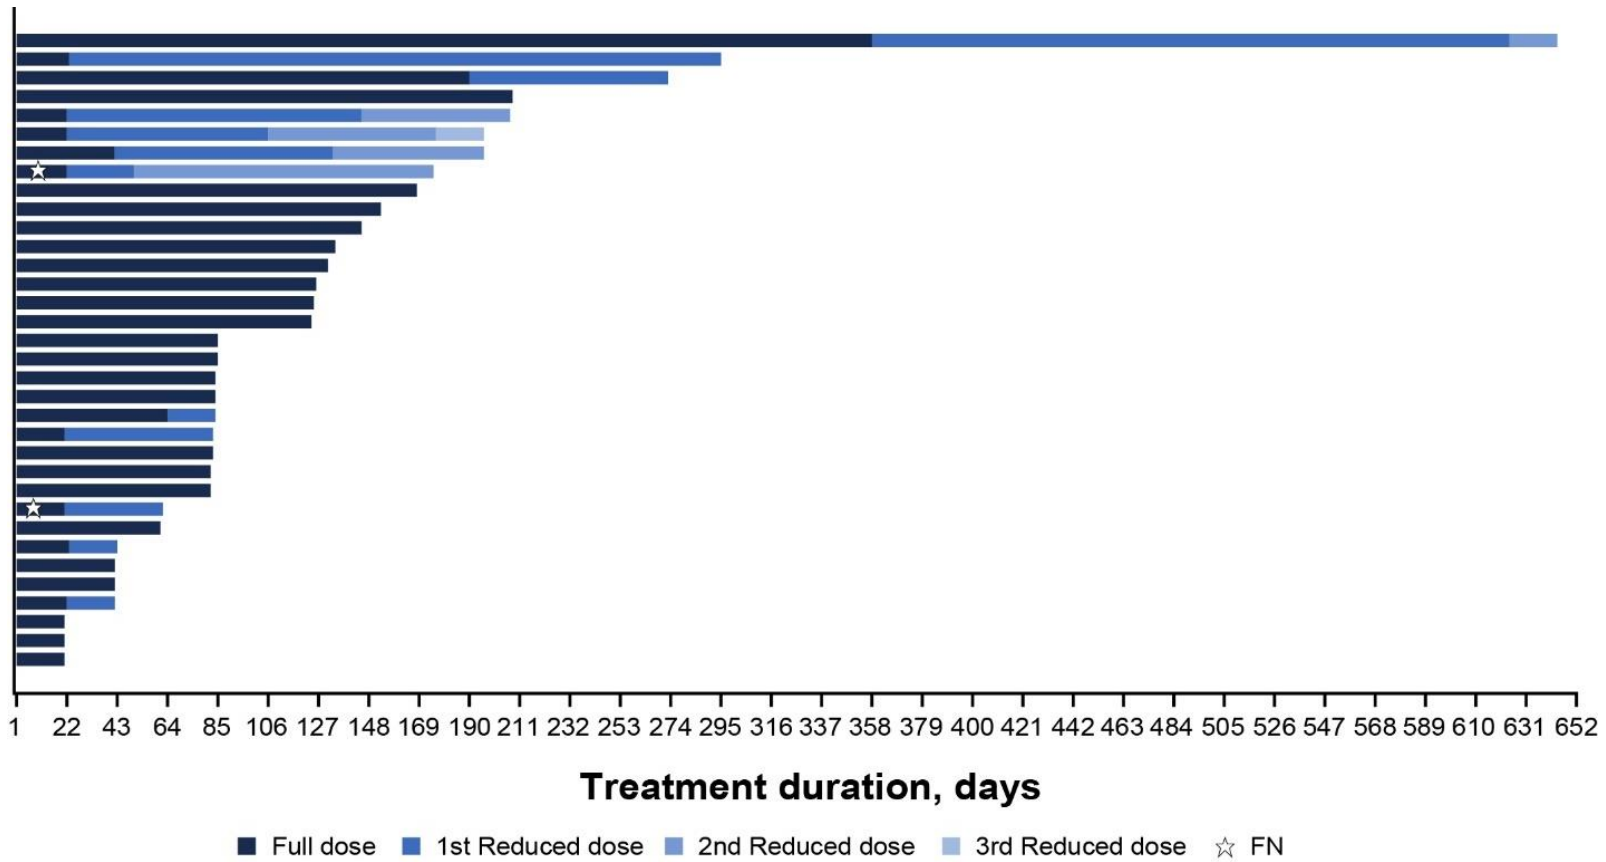

**Supplementary Figure S2.** Swimmer Plot of Patients' Treatment Durations

FN, febrile neutropenia.

Supplement: ccr-22-3027_supplementary_figure_s2_suppfs2.pdf [file ccr-22-3027_supplementary_figure_s2_suppfs2.pdf]
